# Supplementary material
Source: PubMed Central journal article supplement (PMC4341961)

## Supplementary material for A New Clinically-Based Staging System for Perihilar Cholangiocarcinoma

**Supplementary Table 1. Association between initial treatment type and survival of pCCA patients\***

|                             | Unadjusted HR (95% CI) | <i>P</i> | Adjusted HR <sup>†</sup> (95% CI) | <i>P</i> |
|-----------------------------|------------------------|----------|-----------------------------------|----------|
| Best supportive care        | 9.98 (5.34-18.67)      | <0.0001  | 3.02 (1.25-7.33)                  | 0.0144   |
| Palliative biliary drainage | 6.53 (4.58-9.31)       | <0.0001  | 3.23 (1.97-5.29)                  | <0.0001  |
| Resection                   | 2.13 (1.44-3.16)       | 0.0002   | 2.20 (1.35-3.58)                  | 0.0015   |
| Transplantation             | 1.00 (reference)       |          | 1.00 (reference)                  |          |

\*The models included 342 patients who had complete data on all variables.

†Adjusted for age, gender, ethnicity, cirrhosis, primary sclerosing cholangitis, ECOG performance status, maximum tumor size, tumor number, vascular encasement, lymph node metastasis, peritoneal (or other organ) metastasis, and CA 19-9 >1000 U/mL

HR=Hazard ratio

**Supplementary Table 2. Association between variables at the time of pCCA diagnosis and survival of pCCA patients within treatment stratified Cox proportional hazard models\***

| Variables                       | Unadjusted HR | 95% CI     | <i>P</i> | Adjusted HR | 95% CI     | <i>P</i> |
|---------------------------------|---------------|------------|----------|-------------|------------|----------|
| Age per 10 years                | 1.04          | 0.95-1.15  | 0.38     | 1.22        | 1.07-1.40  | 0.0037   |
| Female                          | 1.09          | 0.86-1.38  | 0.49     | 1.29        | 0.97-1.70  | 0.0773   |
| White                           | 0.94          | 0.51-1.73  | 0.84     | 0.78        | 0.39-1.54  | 0.48     |
| Cirrhosis                       | 1.48          | 0.91-2.42  | 0.11     | 1.23        | 0.69-2.17  | 0.48     |
| PSC                             | 0.84          | 0.63-1.14  | 0.26     | 1.42        | 0.93-2.15  | 0.10     |
| ECOG                            |               |            | <0.0001  |             |            | <0.0001  |
| 0                               | 1.00          | reference  |          | 1.00        | reference  |          |
| 1-2                             | 1.72          | 1.34-2.21  | <0.0001  | 1.61        | 1.21-2.14  | 0.0012   |
| 3-4                             | 9.00          | 5.10-15.88 | <0.0001  | 10.60       | 5.11-21.98 | <0.0001  |
| Maximum tumor size <sup>†</sup> | 1.12          | 1.05-1.19  | 0.0006   | 1.23        | 1.07-1.41  | 0.0029   |
| Tumor number                    |               |            | 0.0295   |             |            | 0.13     |
| Non-identified                  | 1.00          | reference  |          | 1.00        | reference  |          |
| Single                          | 1.20          | 0.93-1.56  | 0.17     | 0.65        | 0.38-1.09  | 0.10     |
| Multiple (≥ 2)                  | 1.68          | 1.14-2.47  | 0.0084   | 0.84        | 0.38-1.83  | 0.65     |
| Vascular encasement             | 1.26          | 0.99-1.60  | 0.0596   | 1.27        | 0.95-1.70  | 0.11     |

| Variables                              | Unadjusted HR | 95% CI    | <i>P</i> | Adjusted HR | 95% CI    | <i>P</i> |
|----------------------------------------|---------------|-----------|----------|-------------|-----------|----------|
| Lymph node metastasis                  |               |           | 0.52     |             |           | 0.13     |
| None                                   | 1.00          | reference |          | 1.00        | reference |          |
| Hilar                                  | 0.89          | 0.54-1.45 | 0.63     | 0.68        | 0.38-1.20 | 0.18     |
| Distant                                | 1.18          | 0.84-1.66 | 0.35     | 1.34        | 0.85-2.09 | 0.21     |
| Peritoneal (or other organ) metastasis | 2.73          | 1.90-3.95 | <0.0001  | 3.01        | 1.84-4.93 | <0.0001  |
| CA 19-9 >1000 U/mL                     | 2.01          | 1.52-2.66 | <0.0001  | 1.80        | 1.32-2.46 | 0.0002   |

\*The models included 342 patients who had complete data on all variables.

†Based on the spline function analysis (i.e. a spline curve of size vs. hazard ratio of the entire cohort), there was no evidence for a further increase in risk of death beyond a tumor size of 6 cm (Supplementary Figure 2). Once a linear size effect from 0 to 6 cm was accounted for, there was no further significant effect of size ( $P = 0.17$ ). A tumor size >6 cm was therefore coded as 6 cm.

HR=Hazard ratio

**Supplementary Table 3. Kaplan-Meier estimate of median survival and survival rate of pCCA patients in the transplantation group classified by the proposed staging system (n=92)**

| Stage | Number of death/total | Median survival (months) | 1-year Kaplan- Meier estimate (95% CI) | 5-year Kaplan- Meier estimate (95% CI) | Univariate HR (95% CI) | <i>P</i> |
|-------|-----------------------|--------------------------|----------------------------------------|----------------------------------------|------------------------|----------|
| I     | 7/33                  | Not reached              | 97.0% (91.3-100.0)                     | 77.9% (64.6-93.8)                      | 1.00 (reference)       | <0.0001  |
| II    | 22/40                 | 52.1                     | 76.5% (64.2-91.2)                      | 44.1% (30.7-63.3)                      | 3.58 (1.53-8.40)       | 0.0033   |
| III   | 16/19                 | 15.5                     | 55.7% (36.9-84.1)                      | 6.2% (0.9-41.1)                        | 11.01 (4.43-27.38)     | <0.0001  |
| IV    | 0/0                   | -                        | -                                      | -                                      | -                      | -        |

**Supplementary Table 4. Kaplan-Meier estimate of median survival and survival rate of pCCA patients in the resection group classified by the proposed staging system (n=74)\***

| Stage | Number of death/total | Median survival (months) | 1-year Kaplan- Meier estimate (95% CI) | 5-year Kaplan- Meier estimate (95% CI) | Univariate HR (95% CI) | <i>P</i> |
|-------|-----------------------|--------------------------|----------------------------------------|----------------------------------------|------------------------|----------|
| I     | 24/32                 | 35.2                     | 78.0% (64.8-93.8)                      | 19.3% (7.9-42.9)                       | 1.00 (reference)       | 0.41     |
| II    | 18/26                 | 20.2                     | 70.8% (54.8-91.6)                      | 22.1% (9.6-50.8)                       | 1.07 (0.58-1.98)       | 0.83     |
| III   | 11/16                 | 9.7                      | 47.4% (27.8-80.8)                      | 16.2% (3.4-78.7)                       | 1.62 (0.78-3.33)       | 0.19     |
| IV    | 0/0                   | -                        | -                                      | -                                      | -                      | -        |

\*The analysis included 74 patients who had complete data for both the proposed staging system and the TNM staging system.

**Supplementary Table 5. Kaplan-Meier estimate of median survival and survival rate of pCCA patients in the palliative biliary drainage group classified by the proposed staging system (n=218)\***

| Stage | Number of death/total | Median survival (months) | 6-month Kaplan- Meier estimate (95% CI) | 1-year Kaplan- Meier estimate (95% CI) | Univariate HR (95% CI) | <i>P</i> |
|-------|-----------------------|--------------------------|-----------------------------------------|----------------------------------------|------------------------|----------|
| I     | 8/11                  | 20.8                     | 100%                                    | 88.9% (70.6-100)                       | 1.00 (reference)       | <0.0001  |
| II    | 22/34                 | 12.4                     | 81.7% (68.4-97.6)                       | 57.8% (41.0-80.5)                      | 1.82 (0.81-4.11)       | 0.15     |
| III   | 92/119                | 7.7                      | 57.7% (48.8-68.2)                       | 32.4% (24.3-43.2)                      | 2.87 (1.38-5.99)       | 0.0049   |
| IV    | 47/54                 | 3.0                      | 24.1% (14.4-40.1)                       | 8.8% (3.4-22.3)                        | 7.70 (3.52-16.82)      | <0.0001  |

\*The analysis included 218 patients who had complete data for both the proposed staging system and the TNM staging system.

**Supplementary Table 6. Kaplan-Meier estimate of median survival and survival rate of pCCA patients in the best supportive care group classified by the proposed staging system (n=15)**

| Stage | Number of death/total | Median survival (months) | 3-month Kaplan- Meier estimate (95% CI) | 6-month Kaplan- Meier estimate (95% CI) | 1-year Kaplan- Meier estimate (95% CI) | Univariate HR (95% CI) | <i>P</i> |
|-------|-----------------------|--------------------------|-----------------------------------------|-----------------------------------------|----------------------------------------|------------------------|----------|
| I     | 0/0                   | -                        | -                                       | -                                       | -                                      | -                      | -        |
| II    | 0/1                   | -                        | 100.0%                                  | -                                       | -                                      | 0.00 (0.00-0.67)       | 0.0245   |
| III   | 10/10                 | 6.1                      | 100.0%                                  | 50.0% (26.9-92.9)                       | 20.0% (5.8-69.1)                       | 0.04 (0.01-0.42)       | 0.0063   |
| IV    | 4/4                   | 1.0                      | 25.0% (4.6-100)                         | -                                       | -                                      | 1.00 (reference)       | 0.0241   |

**Supplementary Table 7. Kaplan-Meier estimate of median survival and survival rate of pCCA patients in the transplantation group classified by the radiologic TNM staging system (n=92)**

| Stage | Number of death/total | Median survival (months) | 1-year Kaplan- Meier estimate (95% CI) | 5-year Kaplan- Meier estimate (95% CI) | Univariate HR (95% CI) | <i>P</i> |
|-------|-----------------------|--------------------------|----------------------------------------|----------------------------------------|------------------------|----------|
| I/II  | 13/43                 | Not reached              | 88.2% (78.9-98.5)                      | 70.4% (57.2-86.0)                      | 1.00 (reference)       | 0.0041   |
| III   | 3/4                   | 15.5                     | 75.0% (42.6-100.0)                     | 25.0% (4.6-100.0)                      | 4.06 (1.15-14.35)      | 0.0293   |
| IV    | 29/45                 | 31.1                     | 72.2% (60.0-86.9)                      | 31.9% (20.5-49.6)                      | 2.84 (1.47-5.47)       | 0.0018   |

**Supplementary Table 8. Kaplan-Meier estimate of median survival and survival rate of pCCA patients in the resection group classified by the radiologic TNM staging system (n=74)\***

| Stage | Number of death/total | Median survival (months) | 1-year Kaplan- Meier estimate (95% CI) | 5-year Kaplan- Meier estimate (95% CI) | Univariate HR (95% CI) | <i>P</i> |
|-------|-----------------------|--------------------------|----------------------------------------|----------------------------------------|------------------------|----------|
| I/II  | 17/55                 | 25.3                     | 67.2% (56.1-80.5)                      | 20.8% (11.5-36.4)                      | 1.00 (reference)       | 0.36     |
| III   | 4/17                  | 29.2                     | 72.2% (54.2-96.2)                      | 18.4% (5.6-60.9)                       | 1.13 (0.60-2.12)       | 0.71     |
| IV    | 0/2                   | 8.7                      | 50.0% (12.5-100.0)                     | -                                      | 2.82 (0.66-12.01)      | 0.16     |

\*The analysis included 74 patients who had complete data for both the proposed staging system and the TNM staging system.

**Supplementary Table 9. Kaplan-Meier estimate of median survival and survival rate of pCCA patients in the palliative biliary drainage group classified by the radiologic TNM staging system (n=218)\***

| Stage | Number of death/total | Median survival (months) | 6-month Kaplan- Meier estimate (95% CI) | 1-year Kaplan- Meier estimate (95% CI) | Univariate HR (95% CI) | <i>P</i> |
|-------|-----------------------|--------------------------|-----------------------------------------|----------------------------------------|------------------------|----------|
| I/II  | 18/23                 | 7.7                      | 65.9% (48.2-90.1)                       | 44.3% (26.8-73.2)                      | 1.00 (reference)       | 0.50     |
| III   | 21/23                 | 9.5                      | 54.5% (37.3-79.9)                       | 40.9% (24.8-67.6)                      | 1.34 (0.69-2.63)       | 0.39     |
| IV    | 135/178               | 6.4                      | 53.1% (45.6-61.8)                       | 29.8% (23.1-38.4)                      | 1.38 (0.81-2.35)       | 0.24     |

\*The analysis included 218 patients who had complete data for both the proposed staging system and the TNM staging system.

**Supplementary Table 10. Kaplan-Meier estimate of median survival and survival rate of pCCA patients in the best supportive care group classified by the radiologic TNM staging system (n=15)**

| Stage | Number of death/total | Median survival (months) | 3-month Kaplan- Meier estimate (95% CI) | 6-month Kaplan- Meier estimate (95% CI) | 1-year Kaplan- Meier estimate (95% CI) | Univariate HR (95% CI) | <i>P</i> |
|-------|-----------------------|--------------------------|-----------------------------------------|-----------------------------------------|----------------------------------------|------------------------|----------|
| I/II  | 0/0                   | -                        | -                                       | -                                       | -                                      | -                      | -        |
| III   | 2/2                   | 3.1                      | 100%                                    | 50.0% (12.5-100.0)                      | 50.0% (12.5-100.0)                     | 1.00 (reference)       |          |
| IV    | 12/13                 | 5.6                      | 76.9% (57.1-100.0)                      | 35.2% (16.3-76.1)                       | 8.8% (1.4-56.7)                        | 1.34 (0.28-6.39)       | 0.71     |

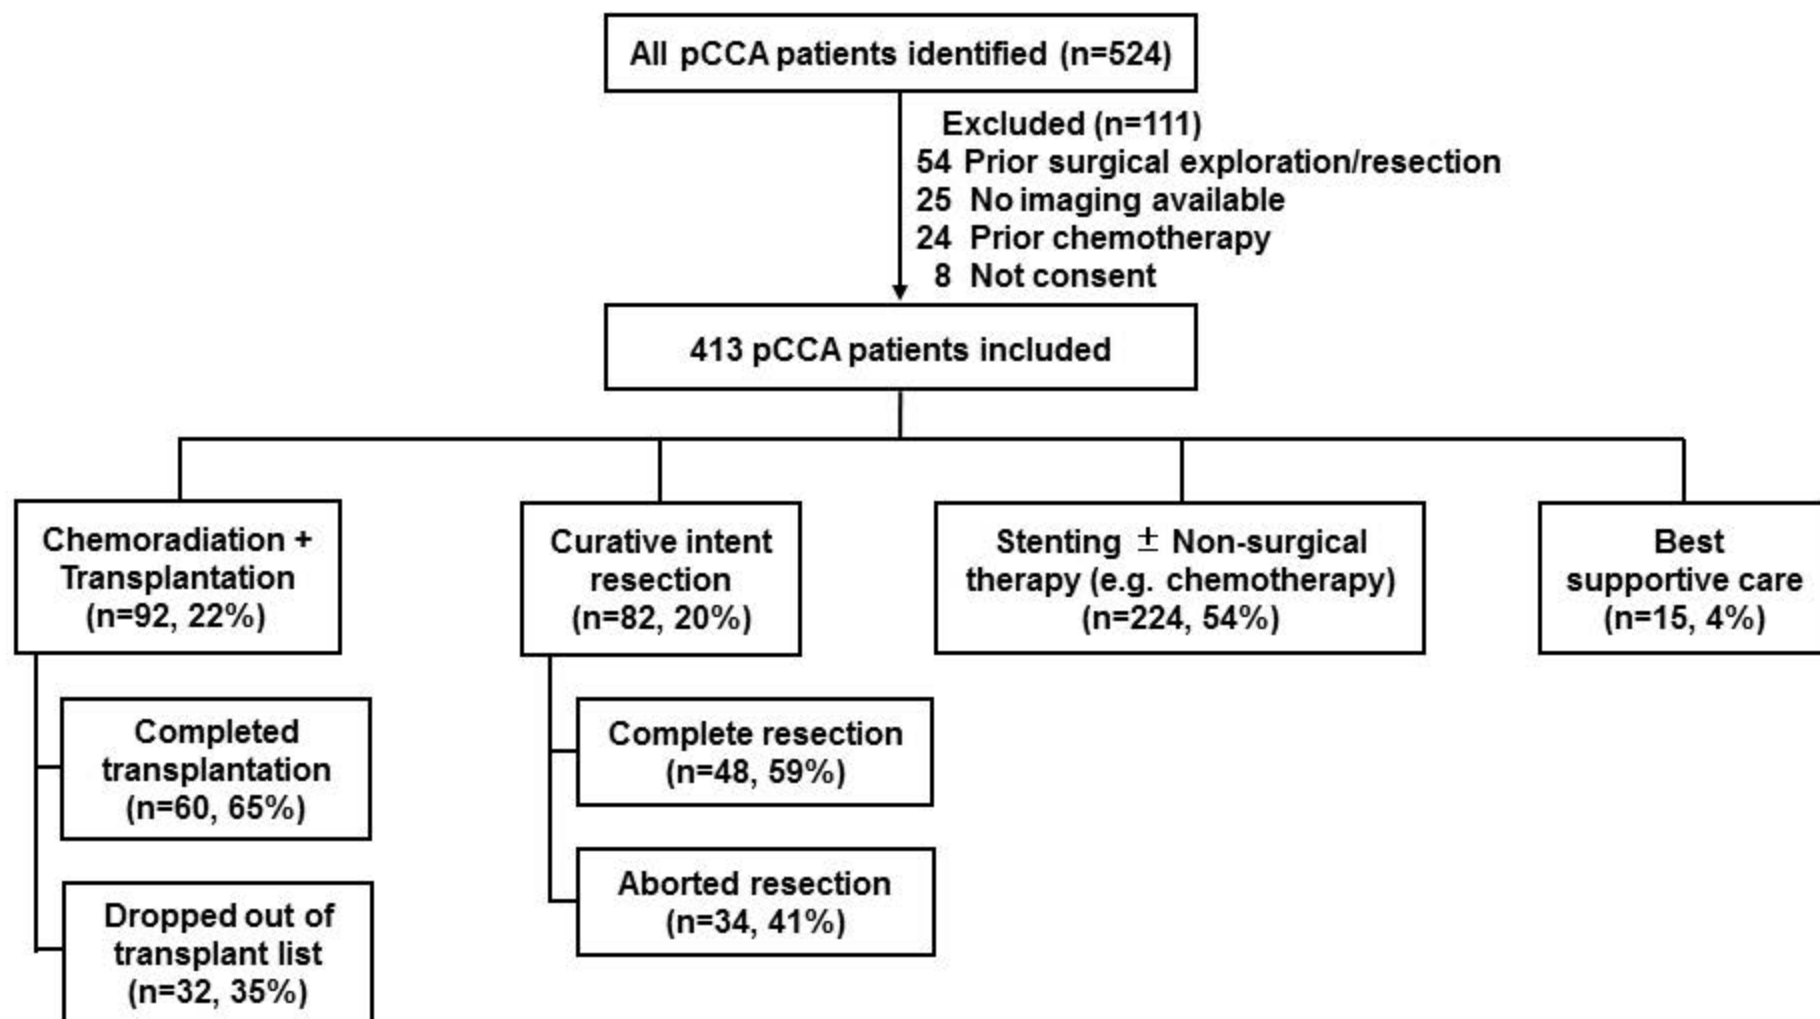



Supplemental Figure 2

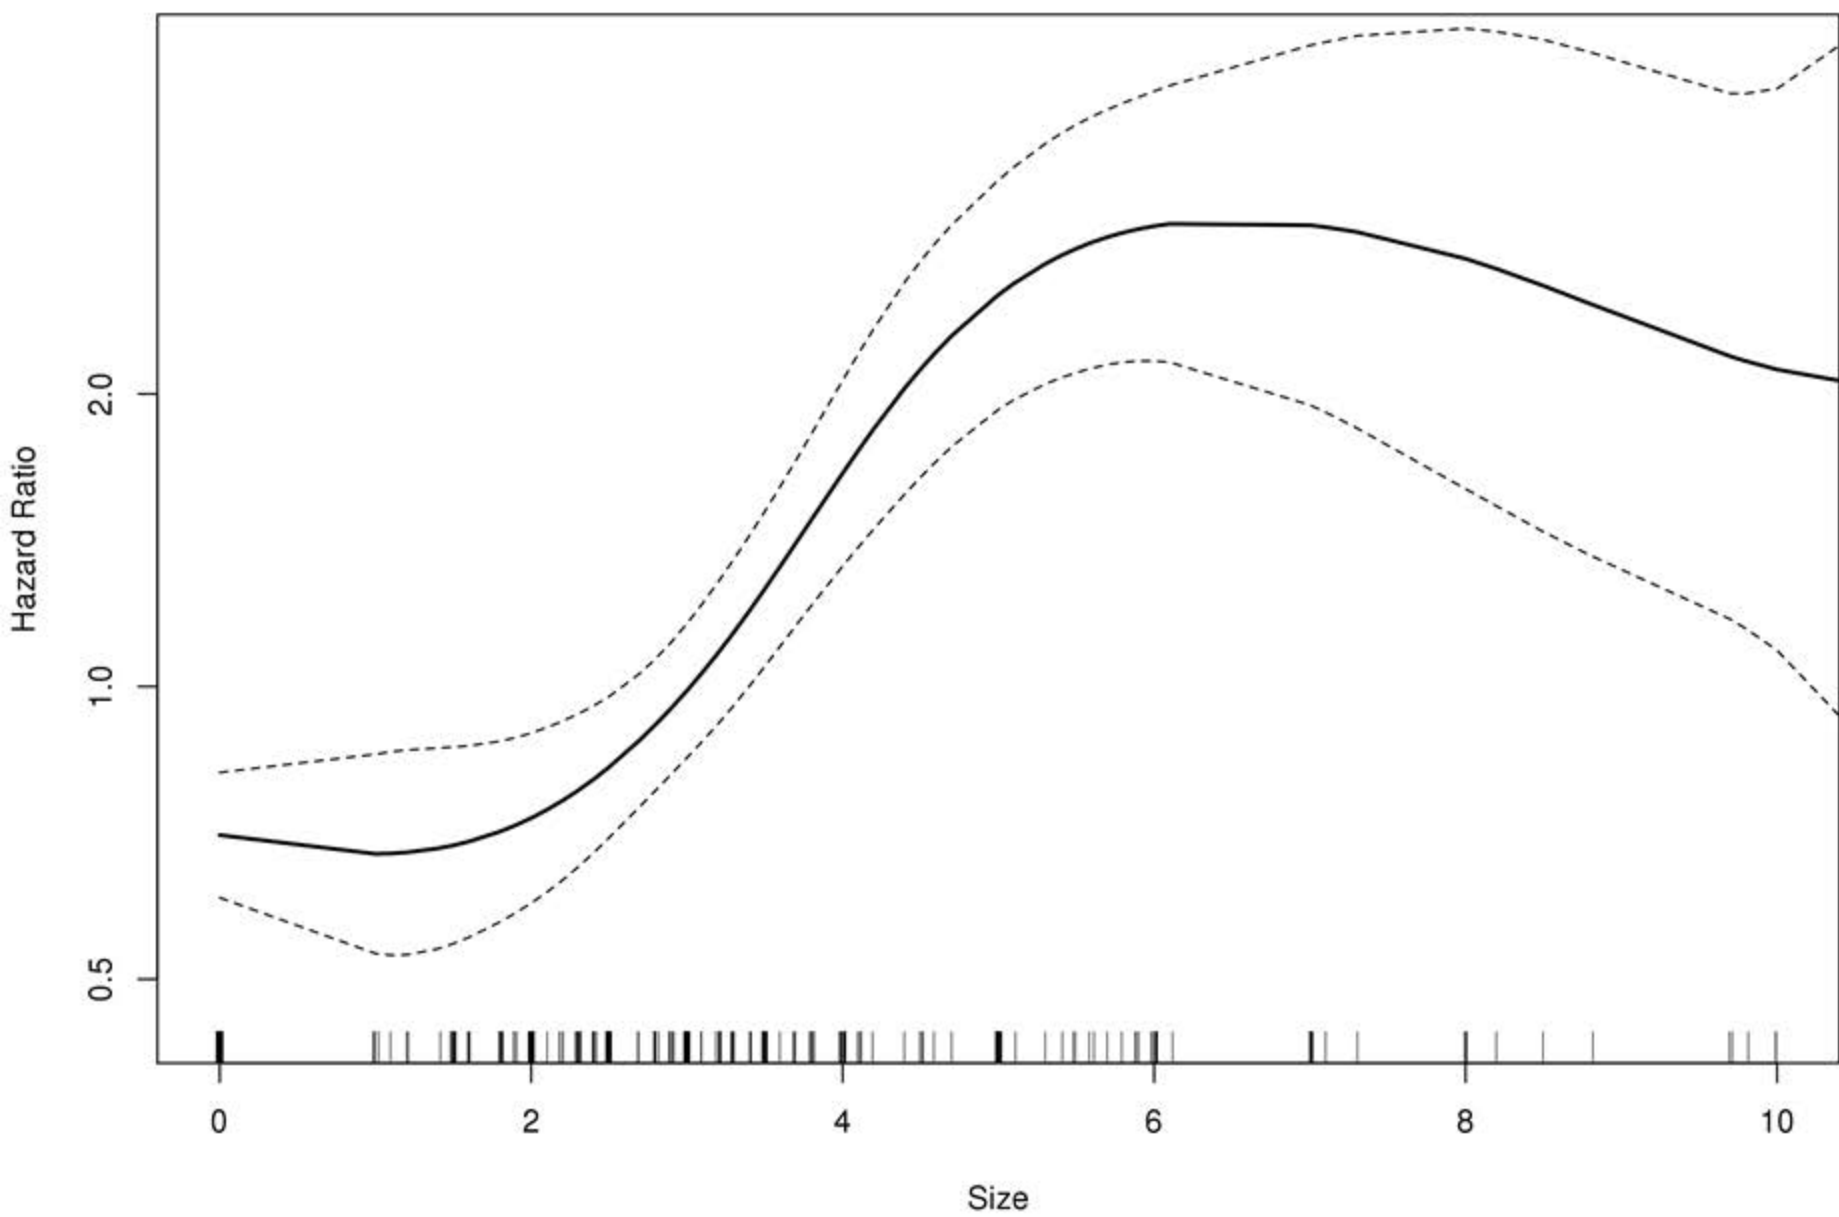

Supplement: NIHMS663197-supplement-Supplemental.pdf [file NIHMS663197-supplement-Supplemental.pdf]
